# Supplementary material
Source: MDPI journal article supplement (https://www.mdpi.com/2571-8789/6/2/42)
Supplement: s1 [file s1]

Supplementary material. Table S1. Weekly means and error standard for the variables in the two soil types.

| Soil       | Weeks | Variable | Treatments |      |         |      |       |      |         |      |
|------------|-------|----------|------------|------|---------|------|-------|------|---------|------|
|            |       |          | Control    |      | Steiner |      | Solid |      | Organic |      |
|            |       |          | Mean       | S.E. | Mean    | S.E. | Mean  | S.E. | Mean    | S.E. |
| Calcareous | 1     | pH       | 7.53       | 0.24 | 7.62    | 0.1  | 7.25  | 0.12 | 7.81    | 0.06 |
| Calcareous | 2     | pH       | 7.81       | 0.03 | 7.63    | 0.07 | 7.41  | 0.01 | 7.8     | 0.03 |
| Calcareous | 3     | pH       | 8.01       | 0.29 | 7.52    | 0.11 | 7.41  | 0.07 | 7.97    | 0.17 |
| Calcareous | 4     | pH       | 8.11       | 0.05 | 7.44    | 0.12 | 7.59  | 0.09 | 7.82    | 0.05 |
| Calcareous | 5     | pH       | 7.93       | 0.42 | 7.45    | 0.12 | 7.48  | 0.12 | 7.75    | 0.14 |
| Calcareous | 6     | pH       | 7.69       | 0.08 | 7.77    | 0.02 | 7.32  | 0.08 | 7.75    | 0.04 |
| Calcareous | 7     | pH       | 7.73       | 0.05 | 7.56    | 0.09 | 7.31  | 0.03 | 7.67    | 0.07 |
| Calcareous | 8     | pH       | 8.08       | 0.23 | 7.62    | 0.09 | 7.51  | 0.06 | 8.03    | 0.06 |
| Calcareous | 9     | pH       | 8.08       | 0.02 | 7.62    | 0.04 | 7.64  | 0.03 | 7.84    | 0.05 |
| Calcareous | 10    | pH       | 7.74       | 0.26 | 7.53    | 0.12 | 7.13  | 0.05 | 7.69    | 0.1  |
| Calcareous | 11    | pH       | 7.86       | 0.04 | 7.71    | 0.06 | 7.41  | 0.04 | 7.75    | 0.04 |
| Calcareous | 12    | pH       | 7.84       | 0.1  | 7.49    | 0.08 | 7.35  | 0.07 | 7.81    | 0.1  |
| Calcareous | 13    | pH       | 8.13       | 0.13 | 7.62    | 0.08 | 7.58  | 0.05 | 7.95    | 0.08 |
| Calcareous | 14    | pH       | 8.07       | 0.04 | 7.43    | 0.11 | 7.46  | 0.18 | 7.77    | 0.12 |
| Forest     | 1     | pH       | 7.46       | 0.04 | 7.63    | 0.05 | 7.51  | 0.13 | 7.74    | 0.02 |
| Forest     | 2     | pH       | 7.68       | 0.03 | 7.59    | 0.08 | 7.47  | 0.08 | 7.73    | 0.05 |
| Forest     | 3     | pH       | 7.68       | 0.07 | 7.65    | 0.08 | 7.66  | 0.16 | 7.75    | 0.1  |
| Forest     | 4     | pH       | 7.81       | 0.09 | 7.51    | 0.01 | 7.64  | 0.04 | 7.94    | 0.06 |
| Forest     | 5     | pH       | 7.48       | 0.21 | 7.51    | 0.15 | 7.38  | 0.14 | 7.63    | 0.09 |
| Forest     | 6     | pH       | 7.54       | 0.06 | 7.68    | 0.05 | 7.39  | 0.06 | 7.71    | 0.01 |
| Forest     | 7     | pH       | 7.59       | 0.05 | 7.44    | 0.07 | 7.42  | 0.04 | 7.67    | 0.02 |
| Forest     | 8     | pH       | 7.82       | 0.08 | 7.7     | 0.01 | 7.63  | 0.04 | 7.99    | 0.02 |
| Forest     | 9     | pH       | 7.77       | 0.06 | 7.59    | 0.03 | 7.62  | 0.06 | 7.68    | 0.1  |
| Forest     | 10    | pH       | 7.45       | 0.12 | 7.49    | 0.14 | 7.3   | 0.03 | 7.64    | 0.06 |
| Forest     | 11    | pH       | 7.59       | 0.06 | 7.59    | 0.05 | 7.46  | 0.01 | 7.64    | 0.04 |
| Forest     | 12    | pH       | 7.68       | 0.05 | 7.6     | 0.09 | 7.46  | 0.09 | 7.72    | 0.12 |
| Forest     | 13    | pH       | 7.84       | 0.1  | 7.63    | 0.03 | 7.66  | 0.02 | 7.79    | 0.06 |
| Forest     | 14    | pH       | 7.87       | 0.27 | 7.47    | 0.13 | 7.63  | 0.1  | 7.63    | 0.09 |

| Treatments |       |          |         |      |         |      |       |      |         |      |
|------------|-------|----------|---------|------|---------|------|-------|------|---------|------|
| Soil       | Weeks | Variable | Control |      | Steiner |      | Solid |      | Organic |      |
|            |       |          | Mean    | S.E. | Mean    | S.E. | Mean  | S.E. | Mean    | S.E. |
| Calcareous | 1     | EC       | 1.03    | 0.03 | 1.18    | 0.16 | 5.26  | 0.18 | 0.96    | 0.03 |
| Calcareous | 2     | EC       | 0.86    | 0.02 | 1.63    | 0.02 | 4.03  | 0.79 | 1.18    | 0.06 |
| Calcareous | 3     | EC       | 0.86    | 0.02 | 2.07    | 0.13 | 3.41  | 0.06 | 1.31    | 0.05 |
| Calcareous | 4     | EC       | 0.77    | 0.01 | 3.44    | 0.76 | 3.39  | 0.06 | 1.41    | 0.03 |
| Calcareous | 5     | EC       | 0.91    | 0.01 | 4.43    | 1.74 | 2.95  | 0.72 | 1.45    | 0.22 |
| Calcareous | 6     | EC       | 0.89    | 0.03 | 1.18    | 0.12 | 6.56  | 0.56 | 1.06    | 0.02 |
| Calcareous | 7     | EC       | 0.83    | 0.01 | 1.73    | 0.11 | 3.83  | 0.17 | 1.15    | 0.03 |
| Calcareous | 8     | EC       | 0.83    | 0.01 | 2.21    | 0.06 | 3.22  | 0.13 | 1.3     | 0.02 |
| Calcareous | 9     | EC       | 0.86    | 0.03 | 3.32    | 0.41 | 3.26  | 0.35 | 1.51    | 0.11 |
| Calcareous | 10    | EC       | 0.98    | 0.04 | 2.17    | 1.16 | 4.81  | 0.88 | 1.15    | 0.24 |
| Calcareous | 11    | EC       | 0.83    | 0.04 | 1.43    | 0.1  | 4.1   | 0.52 | 1       | 0.01 |
| Calcareous | 12    | EC       | 0.77    | 0.01 | 1.78    | 0.11 | 3.29  | 0.02 | 1.12    | 0.06 |
| Calcareous | 13    | EC       | 0.74    | 0.01 | 2.28    | 0.19 | 2.95  | 0.19 | 1.28    | 0.11 |
| Calcareous | 14    | EC       | 0.78    | 0.02 | 3.14    | 0.36 | 3.56  | 0.39 | 1.51    | 0.13 |
| Forest     | 1     | EC       | 1.44    | 0.05 | 1.78    | 0.07 | 3.37  | 0.53 | 1.65    | 0.06 |
| Forest     | 2     | EC       | 1.41    | 0.07 | 2.06    | 0.06 | 3.5   | 0.24 | 1.81    | 0.03 |
| Forest     | 3     | EC       | 1.51    | 0.04 | 2.73    | 0.11 | 3.26  | 0.23 | 2.12    | 0.04 |
| Forest     | 4     | EC       | 1.76    | 0.01 | 3.52    | 0.15 | 3.25  | 0.11 | 2.27    | 0.06 |
| Forest     | 5     | EC       | 1.52    | 0.11 | 4       | 1.17 | 5.09  | 1.56 | 2.25    | 0.38 |
| Forest     | 6     | EC       | 1.67    | 0.02 | 1.92    | 0.07 | 6.67  | 0.94 | 1.47    | 0.07 |
| Forest     | 7     | EC       | 1.54    | 0.08 | 2.81    | 0.37 | 4.35  | 0.16 | 1.58    | 0.07 |
| Forest     | 8     | EC       | 1.66    | 0.03 | 3.83    | 0.39 | 3.88  | 0.42 | 1.91    | 0.04 |
| Forest     | 9     | EC       | 1.81    | 0.05 | 4.19    | 0.16 | 3.7   | 0.09 | 2.26    | 0.14 |
| Forest     | 10    | EC       | 1.56    | 0.04 | 2.61    | 0.76 | 6.51  | 1.34 | 1.87    | 0.18 |
| Forest     | 11    | EC       | 1.5     | 0.05 | 2.16    | 0.08 | 4.96  | 0.64 | 1.82    | 0.03 |
| Forest     | 12    | EC       | 1.51    | 0.04 | 2.57    | 0.18 | 6.09  | 1.29 | 1.8     | 0.13 |
| Forest     | 13    | EC       | 1.76    | 0.1  | 3.28    | 0.16 | 3.42  | 0.45 | 2.21    | 0.09 |
| Forest     | 14    | EC       | 1.97    | 0.09 | 4.17    | 0.38 | 3.53  | 0.14 | 2.52    | 0.12 |

|            |       |          | Treatments |       |         |       |        |       |         |       |
|------------|-------|----------|------------|-------|---------|-------|--------|-------|---------|-------|
|            |       |          | Control    |       | Steiner |       | Solid  |       | Organic |       |
| Soil       | Weeks | Variable | Mean       | S.E.  | Mean    | S.E.  | Mean   | S.E.  | Mean    | S.E.  |
| Calcareous | 1     | ORP      | 180.33     | 21.17 | 188     | 24.03 | 197.67 | 16.76 | 173.33  | 21.07 |
| Calcareous | 2     | ORP      | 209        | 8.72  | 222.33  | 7.22  | 242    | 9.24  | 230.33  | 24.88 |
| Calcareous | 3     | ORP      | 212        | 8.74  | 241     | 16.7  | 257.67 | 27    | 253.33  | 24.18 |
| Calcareous | 4     | ORP      | 217        | 23.35 | 233     | 11.93 | 233    | 13    | 216.33  | 3.18  |
| Calcareous | 5     | ORP      | 171.33     | 16.7  | 198.33  | 18.99 | 201.33 | 22.02 | 187.67  | 15.41 |
| Calcareous | 6     | ORP      | 204.67     | 21.67 | 204.33  | 23.33 | 217    | 14.42 | 197     | 21.01 |
| Calcareous | 7     | ORP      | 238.67     | 15.68 | 244.67  | 16.18 | 247    | 4.93  | 252.67  | 27.03 |
| Calcareous | 8     | ORP      | 211.33     | 10.41 | 220     | 3.79  | 238.33 | 11.62 | 228     | 5.57  |
| Calcareous | 9     | ORP      | 196        | 18.01 | 227     | 3     | 219.67 | 1.76  | 203     | 10.02 |
| Calcareous | 10    | ORP      | 174.33     | 11.46 | 176.33  | 14.38 | 196.67 | 12.99 | 193     | 16.56 |
| Calcareous | 11    | ORP      | 226        | 14.18 | 229.33  | 6.94  | 246    | 14.01 | 222.33  | 12.84 |
| Calcareous | 12    | ORP      | 220.67     | 12.25 | 237.33  | 14.86 | 243    | 3.61  | 231     | 25.97 |
| Calcareous | 13    | ORP      | 204.67     | 13.42 | 224     | 2.65  | 232    | 5.86  | 220.33  | 5.24  |
| Calcareous | 14    | ORP      | 199        | 15.57 | 216.33  | 2.85  | 222.67 | 0.33  | 204     | 10.69 |
| Forest     | 1     | ORP      | 190.67     | 16.37 | 194.33  | 15.62 | 206    | 16.86 | 195     | 17.39 |
| Forest     | 2     | ORP      | 201.67     | 11.05 | 210.23  | 5.91  | 224.33 | 14.08 | 203.67  | 4.98  |
| Forest     | 3     | ORP      | 234.67     | 8.74  | 230.33  | 6.96  | 224.33 | 10.33 | 219.33  | 5.81  |
| Forest     | 4     | ORP      | 204.33     | 10.71 | 210.67  | 3.48  | 208.67 | 2.4   | 211.33  | 6.64  |
| Forest     | 5     | ORP      | 187.33     | 9.96  | 204     | 17.04 | 209.67 | 10.74 | 201     | 14.74 |
| Forest     | 6     | ORP      | 188.67     | 5.78  | 203.33  | 5.36  | 220.67 | 2.91  | 210.33  | 9.53  |
| Forest     | 7     | ORP      | 234.33     | 11.89 | 229.33  | 13.13 | 236    | 13.23 | 198.67  | 7.86  |
| Forest     | 8     | ORP      | 215        | 7.94  | 222.67  | 11.26 | 219.33 | 6.06  | 224     | 6.81  |
| Forest     | 9     | ORP      | 189.33     | 7.88  | 216.67  | 3.84  | 209.67 | 3.28  | 207.67  | 2.73  |
| Forest     | 10    | ORP      | 177.33     | 17.14 | 199     | 15.59 | 206.33 | 10.81 | 193.67  | 11.32 |
| Forest     | 11    | ORP      | 178        | 18.34 | 186.33  | 22.85 | 213.33 | 1.2   | 208.67  | 10.11 |
| Forest     | 12    | ORP      | 222        | 18.15 | 238.33  | 2.73  | 236.67 | 11.02 | 219.67  | 5.81  |
| Forest     | 13    | ORP      | 200.67     | 7.54  | 214.67  | 1.76  | 216    | 6.66  | 219     | 9.29  |
| Forest     | 14    | ORP      | 200.33     | 9.94  | 218     | 7.09  | 211.33 | 6.96  | 206     | 5.51  |

|            |       |                 | Treatments |       |         |        |         |        |         |       |
|------------|-------|-----------------|------------|-------|---------|--------|---------|--------|---------|-------|
|            |       |                 | Control    |       | Steiner |        | Solid   |        | Organic |       |
| Soil       | Weeks | Variable        | Mean       | S.E.  | Mean    | S.E.   | Mean    | S.E.   | Mean    | S.E.  |
| Calcareous | 1     | NO <sub>3</sub> | 105        | 21.79 | 113.33  | 6.67   | 423.33  | 46.67  | 123.33  | 8.82  |
| Calcareous | 2     | NO <sub>3</sub> | 96.67      | 18.78 | 200     | 30.55  | 2700    | 200    | 107.67  | 16.9  |
| Calcareous | 3     | NO <sub>3</sub> | 160        | 17.32 | 730     | 58.59  | 2066.67 | 176.38 | 133.33  | 8.82  |
| Calcareous | 4     | NO <sub>3</sub> | 115.67     | 12.73 | 630     | 25.17  | 2366.67 | 176.38 | 92      | 14.42 |
| Calcareous | 5     | NO <sub>3</sub> | 56.33      | 5.9   | 680     | 35.12  | 1633.33 | 202.76 | 77      | 16.92 |
| Calcareous | 6     | NO <sub>3</sub> | 64         | 1.15  | 626.67  | 46.31  | 1500    | 115.47 | 71.67   | 12.2  |
| Calcareous | 7     | NO <sub>3</sub> | 101.67     | 14.24 | 943.33  | 84.52  | 1866.67 | 33.33  | 149.67  | 60.47 |
| Calcareous | 8     | NO <sub>3</sub> | 66.67      | 3.53  | 1070    | 85.05  | 1733.33 | 33.33  | 88.33   | 20.99 |
| Calcareous | 9     | NO <sub>3</sub> | 55.67      | 3.53  | 1106.67 | 109.75 | 1733.33 | 33.33  | 77.67   | 21.33 |
| Calcareous | 10    | NO <sub>3</sub> | 67         | 2.52  | 783.33  | 38.44  | 1566.67 | 88.19  | 140     | 11.55 |
| Calcareous | 11    | NO <sub>3</sub> | 140        | 0     | 1700    | 152.75 | 1400    | 115.47 | 166.67  | 14.53 |
| Calcareous | 12    | NO <sub>3</sub> | 47.67      | 2.6   | 2266.67 | 240.37 | 1766.67 | 66.67  | 88.67   | 26.59 |
| Calcareous | 13    | NO <sub>3</sub> | 50.33      | 7.36  | 2166.67 | 328.3  | 1866.67 | 66.67  | 82.67   | 24.11 |
| Calcareous | 14    | NO <sub>3</sub> | 206.67     | 8.82  | 2166.67 | 202.76 | 2300    | 208.17 | 303.33  | 48.42 |
| Forest     | 1     | NO <sub>3</sub> | 350        | 0     | 423.33  | 17.64  | 2586.67 | 875.32 | 380     | 40.41 |
| Forest     | 2     | NO <sub>3</sub> | 356.67     | 28.48 | 530     | 15.28  | 2766.67 | 589.73 | 443.33  | 46.67 |
| Forest     | 3     | NO <sub>3</sub> | 666.67     | 41.77 | 810     | 30     | 2000    | 200    | 610     | 30    |
| Forest     | 4     | NO <sub>3</sub> | 456.67     | 8.82  | 766.67  | 49.1   | 2366.67 | 240.37 | 430     | 10    |
| Forest     | 5     | NO <sub>3</sub> | 423.33     | 3.33  | 850     | 41.63  | 1633.33 | 218.58 | 376.67  | 44.1  |
| Forest     | 6     | NO <sub>3</sub> | 380        | 10    | 1060    | 121.24 | 2366.67 | 622.72 | 296.67  | 12.02 |
| Forest     | 7     | NO <sub>3</sub> | 540        | 32.15 | 1466.67 | 120.19 | 2266.67 | 272.85 | 430     | 15.28 |
| Forest     | 8     | NO <sub>3</sub> | 526.67     | 12.02 | 1433.33 | 88.19  | 2066.67 | 240.37 | 356.67  | 33.33 |
| Forest     | 9     | NO <sub>3</sub> | 496.67     | 12.02 | 1533.33 | 88.19  | 1800    | 173.21 | 343.33  | 43.33 |
| Forest     | 10    | NO <sub>3</sub> | 623.33     | 35.28 | 1733.33 | 185.59 | 1933.33 | 88.19  | 663.33  | 41.77 |
| Forest     | 11    | NO <sub>3</sub> | 766.67     | 53.64 | 1966.67 | 66.67  | 1800    | 152.75 | 670     | 45.83 |
| Forest     | 12    | NO <sub>3</sub> | 606.67     | 81.92 | 1900    | 57.74  | 1566.67 | 120.19 | 423.33  | 78.39 |
| Forest     | 13    | NO <sub>3</sub> | 776.67     | 99.39 | 2500    | 57.74  | 2033.33 | 145.3  | 463.33  | 38.44 |
| Forest     | 14    | NO <sub>3</sub> | 820        | 80.83 | 2533.33 | 166.67 | 2333.33 | 88.19  | 696.67  | 48.42 |

|            |       |          | Treatments |       |         |       |        |       |         |       |
|------------|-------|----------|------------|-------|---------|-------|--------|-------|---------|-------|
|            |       |          | Control    |       | Steiner |       | Solid  |       | Organic |       |
| Soil       | Weeks | Variable | Mean       | S.E.  | Mean    | S.E.  | Mean   | S.E.  | Mean    | S.E.  |
| Calcareous | 1     | N        | 143.59     | 15.06 | 126.26  | 4.29  | 141.11 | 4.29  | 141.11  | 17.15 |
| Calcareous | 2     | N        | 116.35     | 15.06 | 106.46  | 4.95  | 118.83 | 19.65 | 141.11  | 4.29  |
| Calcareous | 3     | N        | 148.54     | 4.29  | 99.02   | 9.9   | 126.26 | 15.46 | 183.2   | 13.1  |
| Calcareous | 4     | N        | 128.73     | 6.55  | 133.68  | 14.85 | 103.98 | 15.46 | 99.03   | 16.24 |
| Calcareous | 5     | N        | 76.75      | 19.34 | 74.27   | 4.29  | 101.5  | 13.78 | 108.93  | 10.79 |
| Calcareous | 6     | N        | 51.99      | 12.86 | 71.79   | 8.92  | 111.41 | 4.29  | 138.64  | 42.3  |
| Calcareous | 7     | N        | 108.93     | 12.38 | 111.41  | 0     | 103.98 | 0     | 123.79  | 6.55  |
| Calcareous | 8     | N        | 138.64     | 2.47  | 108.93  | 13.1  | 108.93 | 8.93  | 133.69  | 44.77 |
| Calcareous | 9     | N        | 126.26     | 15.46 | 131.21  | 21.58 | 128.73 | 6.55  | 103.98  | 11.34 |
| Calcareous | 10    | N        | 165.87     | 28.55 | 131.21  | 24.38 | 121.31 | 9.9   | 155.97  | 22.69 |
| Calcareous | 11    | N        | 108.93     | 17.85 | 96.55   | 12.86 | 121.31 | 4.95  | 106.45  | 16.23 |
| Calcareous | 12    | N        | 141.11     | 17.15 | 138.64  | 10.79 | 163.39 | 30.01 | 165.87  | 16.23 |
| Calcareous | 13    | N        | 146.06     | 13.78 | 178.25  | 22.69 | 153.49 | 20.26 | 128.74  | 17.33 |
| Calcareous | 14    | N        | 101.5      | 2.48  | 79.22   | 2.48  | 96.55  | 4.29  | 128.74  | 13.78 |
| Forest     | 1     | N        | 148.54     | 21.44 | 141.11  | 4.29  | 133.69 | 4.29  | 126.26  | 12.86 |
| Forest     | 2     | N        | 126.26     | 18.69 | 126.26  | 11.34 | 131.21 | 13.78 | 108.93  | 6.55  |
| Forest     | 3     | N        | 126.26     | 19.65 | 123.79  | 6.55  | 163.39 | 26.08 | 143.59  | 32.47 |
| Forest     | 4     | N        | 146.06     | 21.15 | 116.35  | 27.23 | 118.83 | 8.58  | 146.06  | 13.1  |
| Forest     | 5     | N        | 99.03      | 43.38 | 111.41  | 8.58  | 84.17  | 13.1  | 113.88  | 37.46 |
| Forest     | 6     | N        | 155.97     | 63.17 | 146.07  | 58.22 | 99.03  | 6.55  | 101.5   | 6.55  |
| Forest     | 7     | N        | 106.46     | 2.48  | 86.65   | 6.55  | 128.73 | 43.8  | 74.27   | 4.29  |
| Forest     | 8     | N        | 111.41     | 29.71 | 121.31  | 13.78 | 99.03  | 21.58 | 116.35  | 23.62 |
| Forest     | 9     | N        | 148.54     | 4.29  | 118.83  | 0     | 101.5  | 6.55  | 101.5   | 4.95  |
| Forest     | 10    | N        | 111.41     | 11.35 | 136.16  | 15.06 | 133.69 | 11.34 | 106.45  | 16.23 |
| Forest     | 11    | N        | 101.5      | 31.02 | 111.4   | 7.43  | 126.26 | 15.46 | 101.5   | 6.55  |
| Forest     | 12    | N        | 106.46     | 4.95  | 123.78  | 13.1  | 116.36 | 20.27 | 116.36  | 6.55  |
| Forest     | 13    | N        | 183.2      | 27.57 | 215.38  | 7.43  | 195.58 | 16.24 | 178.25  | 11.34 |
| Forest     | 14    | N        | 118.83     | 14.85 | 71.8    | 12.38 | 118.83 | 4.29  | 121.31  | 24.38 |

| Treatments |       |          |         |       |         |        |         |        |         |       |
|------------|-------|----------|---------|-------|---------|--------|---------|--------|---------|-------|
| Soil       | Weeks | Variable | Control |       | Steiner |        | Solid   |        | Organic |       |
|            |       |          | Mean    | S.E.  | Mean    | S.E.   | Mean    | S.E.   | Mean    | S.E.  |
| Calcareous | 1     | Ca       | 104.98  | 11.2  | 89.72   | 4.31   | 535.97  | 187.47 | 124.06  | 27.34 |
| Calcareous | 2     | Ca       | 109.53  | 5.09  | 106.71  | 6.61   | 986.53  | 42.66  | 99.99   | 3.22  |
| Calcareous | 3     | Ca       | 98.5    | 3.66  | 135.9   | 12.75  | 838.9   | 138.07 | 100.56  | 3.23  |
| Calcareous | 4     | Ca       | 82.45   | 5.78  | 147.4   | 16.61  | 541.6   | 93.35  | 98.4    | 6.25  |
| Calcareous | 5     | Ca       | 80.08   | 7.33  | 177.8   | 17.14  | 465.37  | 112.43 | 108.2   | 10.98 |
| Calcareous | 6     | Ca       | 79.28   | 6.62  | 180.37  | 11.41  | 542.35  | 27.05  | 107.36  | 9.21  |
| Calcareous | 7     | Ca       | 83.66   | 6.49  | 215.87  | 7.27   | 387.27  | 30.08  | 113.57  | 2.19  |
| Calcareous | 8     | Ca       | 71.3    | 1.63  | 255.47  | 13.18  | 373.67  | 19.62  | 115.13  | 4.02  |
| Calcareous | 9     | Ca       | 72.8    | 1.31  | 263.6   | 15.02  | 361.9   | 52.88  | 126.93  | 2.98  |
| Calcareous | 10    | Ca       | 93.13   | 3.21  | 300.83  | 7.35   | 468.13  | 31.83  | 144.23  | 3     |
| Calcareous | 11    | Ca       | 89.95   | 5.77  | 490.1   | 105.84 | 390.2   | 33.39  | 157.03  | 5.25  |
| Calcareous | 12    | Ca       | 88.61   | 5.1   | 638.26  | 136.53 | 525.14  | 28.66  | 181.02  | 3.81  |
| Calcareous | 13    | Ca       | 86.66   | 3.68  | 724.35  | 192.54 | 567.45  | 16.42  | 182.6   | 6.16  |
| Calcareous | 14    | Ca       | 77.91   | 3.22  | 564.13  | 111.86 | 583.47  | 83.54  | 170.6   | 3.95  |
| Forest     | 1     | Ca       | 236.28  | 5.88  | 286.24  | 29.11  | 1712.37 | 120.85 | 245.52  | 14.12 |
| Forest     | 2     | Ca       | 280.47  | 23.39 | 368.03  | 26.64  | 1916.63 | 585.14 | 281.67  | 29.6  |
| Forest     | 3     | Ca       | 259.03  | 13.93 | 344.3   | 25.23  | 1211.67 | 180.05 | 267.7   | 18.4  |
| Forest     | 4     | Ca       | 226.23  | 11.31 | 309.03  | 6.76   | 866.37  | 59.77  | 262.47  | 20.75 |
| Forest     | 5     | Ca       | 259.67  | 23.41 | 417.37  | 35.47  | 731.17  | 105.52 | 282.39  | 5.96  |
| Forest     | 6     | Ca       | 245.33  | 11.6  | 518.77  | 34.72  | 1088.17 | 271.46 | 263.5   | 11.58 |
| Forest     | 7     | Ca       | 263.8   | 21.91 | 483.4   | 57.75  | 926.3   | 114.19 | 319.14  | 21.97 |
| Forest     | 8     | Ca       | 258.23  | 18.55 | 616.53  | 63.58  | 756.8   | 132.81 | 298.43  | 13.08 |
| Forest     | 9     | Ca       | 295.23  | 14.56 | 672.03  | 54.43  | 641.57  | 63.11  | 333.87  | 13.08 |
| Forest     | 10    | Ca       | 359.57  | 1.68  | 799.33  | 108.33 | 841.4   | 65.56  | 420.13  | 20.15 |
| Forest     | 11    | Ca       | 400.33  | 8.5   | 742.23  | 174.45 | 649.67  | 69.57  | 452.73  | 19.55 |
| Forest     | 12    | Ca       | 400.77  | 27.74 | 997.66  | 44.97  | 740.3   | 52.68  | 465.74  | 34.95 |
| Forest     | 13    | Ca       | 377.74  | 47.99 | 1142.09 | 74.38  | 793.14  | 27.79  | 510.55  | 43.24 |
| Forest     | 14    | Ca       | 348.9   | 62.72 | 918.97  | 240.05 | 880.4   | 44.62  | 468.97  | 58.49 |

| Treatments |       |          |         |       |         |       |        |       |         |       |
|------------|-------|----------|---------|-------|---------|-------|--------|-------|---------|-------|
| Soil       | Weeks | Variable | Control |       | Steiner |       | Solid  |       | Organic |       |
|            |       |          | Mean    | S.E.  | Mean    | S.E.  | Mean   | S.E.  | Mean    | S.E.  |
| Calcareous | 1     | K        | 14.46   | 3.91  | 14.29   | 1.93  | 119.84 | 39.23 | 12.47   | 3.4   |
| Calcareous | 2     | K        | 14.25   | 0.14  | 19.36   | 3.62  | 82.86  | 26.39 | 11.72   | 0.43  |
| Calcareous | 3     | K        | 12.68   | 2.35  | 16.66   | 4.2   | 58.05  | 6.95  | 9.41    | 0.67  |
| Calcareous | 4     | K        | 11.6    | 0.54  | 20.17   | 4.27  | 68.52  | 5.65  | 11.7    | 1.04  |
| Calcareous | 5     | K        | 17.12   | 2.62  | 27.29   | 4.51  | 69.12  | 5.24  | 13.66   | 1.94  |
| Calcareous | 6     | K        | 6.57    | 0.93  | 15.42   | 4.59  | 127.7  | 19.11 | 9.86    | 1.27  |
| Calcareous | 7     | K        | 11.61   | 0.93  | 21.84   | 2.41  | 75.65  | 13.47 | 12.29   | 0.82  |
| Calcareous | 8     | K        | 13.87   | 3.08  | 33.69   | 13.48 | 46.72  | 5.95  | 12.12   | 0.64  |
| Calcareous | 9     | K        | 12.23   | 0.52  | 29.78   | 3.22  | 44.93  | 17.87 | 16.53   | 0.14  |
| Calcareous | 10    | K        | 13.39   | 0.61  | 28.65   | 0.55  | 69.88  | 13.11 | 16.41   | 0.72  |
| Calcareous | 11    | K        | 11.77   | 0.71  | 35.54   | 8.84  | 176.67 | 40.51 | 16.65   | 1.23  |
| Calcareous | 12    | K        | 12.93   | 1.89  | 38.19   | 5.47  | 137.1  | 24.5  | 17.93   | 0.48  |
| Calcareous | 13    | K        | 12.39   | 0.94  | 42.57   | 6.92  | 133.32 | 21.89 | 19.04   | 0.56  |
| Calcareous | 14    | K        | 8.57    | 1.43  | 31.3    | 5.61  | 138.17 | 20.82 | 17.48   | 0.19  |
| Forest     | 1     | K        | 88.26   | 58.65 | 94.94   | 60.96 | 152.48 | 82.17 | 38.41   | 2.61  |
| Forest     | 2     | K        | 41.92   | 2.74  | 52.78   | 1.58  | 153.87 | 39.83 | 45.3    | 6.47  |
| Forest     | 3     | K        | 43.66   | 5.14  | 43.55   | 0.88  | 107.56 | 25.13 | 41.18   | 6.52  |
| Forest     | 4     | K        | 40.45   | 2.48  | 52.14   | 1.2   | 113.94 | 22.51 | 45.12   | 7.13  |
| Forest     | 5     | K        | 47.28   | 2.58  | 69.65   | 2.91  | 112.28 | 17.83 | 57.83   | 10.64 |
| Forest     | 6     | K        | 30.75   | 0.61  | 59.74   | 6.34  | 208.73 | 62.5  | 38.8    | 6.63  |
| Forest     | 7     | K        | 39.63   | 4.14  | 59.68   | 9.59  | 167.77 | 39.19 | 53.5    | 7.57  |
| Forest     | 8     | K        | 42.75   | 1.67  | 78.52   | 3.62  | 134.02 | 42.56 | 59.67   | 9.28  |
| Forest     | 9     | K        | 51.96   | 3.23  | 98.16   | 8.28  | 108.64 | 22.45 | 72.97   | 11.05 |
| Forest     | 10    | K        | 52.84   | 1.78  | 112.86  | 19.8  | 131.85 | 27.9  | 71.12   | 11.6  |
| Forest     | 11    | K        | 49.19   | 2.03  | 93.46   | 25.6  | 115.3  | 19.21 | 76.68   | 16.73 |
| Forest     | 12    | K        | 54.73   | 3.23  | 125.49  | 17.94 | 107.87 | 17.77 | 87.73   | 14.65 |
| Forest     | 13    | K        | 52.97   | 3.17  | 139.62  | 22.36 | 113.7  | 18.79 | 90.96   | 18.23 |
| Forest     | 14    | K        | 52.27   | 7     | 135.56  | 26.94 | 122.92 | 16.94 | 92.67   | 23.3  |

| Treatments |       |          |         |      |         |       |        |       |         |      |
|------------|-------|----------|---------|------|---------|-------|--------|-------|---------|------|
| Soil       | Weeks | Variable | Control |      | Steiner |       | Solid  |       | Organic |      |
|            |       |          | Mean    | S.E. | Mean    | S.E.  | Mean   | S.E.  | Mean    | S.E. |
| Calcareous | 1     | Mg       | 56.94   | 1.48 | 50.28   | 2.07  | 255.73 | 86.02 | 46.59   | 3.07 |
| Calcareous | 2     | Mg       | 52.95   | 1.2  | 59.35   | 3.07  | 483.4  | 17.28 | 56.24   | 2.28 |
| Calcareous | 3     | Mg       | 53.24   | 1.12 | 72.52   | 4.84  | 404.63 | 63.15 | 58.29   | 3.2  |
| Calcareous | 4     | Mg       | 44.78   | 1.55 | 79.32   | 4.02  | 291.1  | 29.45 | 57.68   | 3.08 |
| Calcareous | 5     | Mg       | 47.82   | 2.64 | 101.4   | 5.63  | 242.97 | 38.94 | 67.14   | 5.66 |
| Calcareous | 6     | Mg       | 42.31   | 2.37 | 91.82   | 4.37  | 207.8  | 8.1   | 59.75   | 2.84 |
| Calcareous | 7     | Mg       | 43.6    | 2.03 | 111.35  | 11.11 | 190.57 | 29.54 | 67.65   | 3.38 |
| Calcareous | 8     | Mg       | 36.5    | 2.68 | 120.9   | 5.69  | 167.13 | 21.62 | 66.16   | 1.24 |
| Calcareous | 9     | Mg       | 37.4    | 1.46 | 126.53  | 10.25 | 153.07 | 25.52 | 70.55   | 0.94 |
| Calcareous | 10    | Mg       | 35.93   | 0.78 | 132.63  | 5.31  | 195.53 | 10.56 | 67.94   | 1.62 |
| Calcareous | 11    | Mg       | 37.68   | 1.74 | 225.47  | 28.84 | 132.37 | 7.72  | 75.73   | 0.35 |
| Calcareous | 12    | Mg       | 38.29   | 2.36 | 265.4   | 40.49 | 191.57 | 4.12  | 89.4    | 1.26 |
| Calcareous | 13    | Mg       | 36.12   | 2    | 281.57  | 50.58 | 206.03 | 3.7   | 88.51   | 1.3  |
| Calcareous | 14    | Mg       | 30.92   | 4.3  | 232.9   | 34.68 | 223.47 | 32.01 | 91.29   | 1.51 |
| Forest     | 1     | Mg       | 30.86   | 1.56 | 36.3    | 2.4   | 182.76 | 15.27 | 34.27   | 1.95 |
| Forest     | 2     | Mg       | 32.82   | 2.22 | 39.51   | 1.83  | 171.53 | 49.83 | 36.36   | 3.35 |
| Forest     | 3     | Mg       | 32.86   | 2.23 | 38.17   | 1.33  | 116.89 | 17.12 | 37.32   | 2.62 |
| Forest     | 4     | Mg       | 34.96   | 2.24 | 39.96   | 0.98  | 91.45  | 9.02  | 39.01   | 3    |
| Forest     | 5     | Mg       | 36.55   | 2.92 | 47.35   | 1.51  | 82.34  | 7.77  | 45.63   | 4.68 |
| Forest     | 6     | Mg       | 28.31   | 0.45 | 48.9    | 2.25  | 121.77 | 33.82 | 36.4    | 4.17 |
| Forest     | 7     | Mg       | 31.1    | 2.78 | 47.64   | 6.4   | 100.54 | 23.7  | 43.12   | 5.61 |
| Forest     | 8     | Mg       | 28.27   | 0.88 | 55      | 4.19  | 70.45  | 11.3  | 39.87   | 3.53 |
| Forest     | 9     | Mg       | 30.87   | 1.37 | 60.89   | 3.49  | 61.08  | 6.35  | 42.08   | 2.87 |
| Forest     | 10    | Mg       | 33.34   | 0.82 | 66.51   | 8.06  | 67.82  | 7.4   | 41.51   | 3.04 |
| Forest     | 11    | Mg       | 36.74   | 1.37 | 64.8    | 13.21 | 62.23  | 4.91  | 46.53   | 2.06 |
| Forest     | 12    | Mg       | 33.89   | 2.35 | 84.12   | 3.69  | 68.61  | 3.33  | 48.22   | 2.49 |
| Forest     | 13    | Mg       | 30.61   | 3.18 | 88.93   | 4.06  | 69.83  | 2.8   | 47.25   | 2.14 |
| Forest     | 14    | Mg       | 33.24   | 4.97 | 78.3    | 21.34 | 81.2   | 1.36  | 49.4    | 7.22 |



|            |       |          | Treatments |      |         |       |       |       |         |       |
|------------|-------|----------|------------|------|---------|-------|-------|-------|---------|-------|
|            |       |          | Control    |      | Steiner |       | Solid |       | Organic |       |
| Soil       | Weeks | Variable | Mean       | S.E. | Mean    | S.E.  | Mean  | S.E.  | Mean    | S.E.  |
| Calcareous | 1     | Na       | 31.56      | 1.63 | 34.52   | 2.25  | 61.43 | 12.96 | 33.52   | 5.27  |
| Calcareous | 2     | Na       | 28.39      | 0.4  | 34.41   | 2.76  | 79.13 | 5.43  | 28.92   | 2.93  |
| Calcareous | 3     | Na       | 30.22      | 0.84 | 41      | 1.98  | 78.7  | 6.09  | 32.5    | 3.6   |
| Calcareous | 4     | Na       | 30.68      | 0.99 | 46.65   | 1.32  | 73.27 | 7.02  | 38.91   | 4.11  |
| Calcareous | 5     | Na       | 33.46      | 2.06 | 55.83   | 4.03  | 71.11 | 4.31  | 46.88   | 5.1   |
| Calcareous | 6     | Na       | 27.84      | 0.53 | 44.76   | 1.52  | 77.47 | 4.77  | 42.03   | 3.24  |
| Calcareous | 7     | Na       | 31.2       | 0.91 | 53.44   | 5.42  | 59.32 | 5.83  | 49.33   | 2.66  |
| Calcareous | 8     | Na       | 38.57      | 9.59 | 57.32   | 0.24  | 52.17 | 8.37  | 53.46   | 2.45  |
| Calcareous | 9     | Na       | 29.85      | 1.05 | 58.45   | 3.27  | 46.92 | 8.11  | 59.45   | 1.49  |
| Calcareous | 10    | Na       | 32.16      | 0.92 | 66.35   | 2.26  | 70.23 | 1.66  | 63.08   | 3.12  |
| Calcareous | 11    | Na       | 32.88      | 0.85 | 86.52   | 10.25 | 70.3  | 5.82  | 72.43   | 1.21  |
| Calcareous | 12    | Na       | 35.02      | 0.68 | 102.35  | 12.36 | 77.34 | 3.23  | 88.6    | 2.26  |
| Calcareous | 13    | Na       | 35.31      | 0.88 | 114.88  | 17.68 | 86.12 | 1.72  | 100.49  | 5.32  |
| Calcareous | 14    | Na       | 26.94      | 3.67 | 89.56   | 15.69 | 86.2  | 10.11 | 97.52   | 3.9   |
| Forest     | 1     | Na       | 27.13      | 1.87 | 30.92   | 2.47  | 83.32 | 11.31 | 27.36   | 3.66  |
| Forest     | 2     | Na       | 26.07      | 2.07 | 33.3    | 2.06  | 54.07 | 12.54 | 30.93   | 3.3   |
| Forest     | 3     | Na       | 28.02      | 2.27 | 35.98   | 2.92  | 49.66 | 7.87  | 33.49   | 2.81  |
| Forest     | 4     | Na       | 29.92      | 2.84 | 38.48   | 3.51  | 42.67 | 5.93  | 33.97   | 1.36  |
| Forest     | 5     | Na       | 31.97      | 1.37 | 44.74   | 5.48  | 41.8  | 6.28  | 40.32   | 1.65  |
| Forest     | 6     | Na       | 27.3       | 2.08 | 43.82   | 2.23  | 59.28 | 13.18 | 35.6    | 0.65  |
| Forest     | 7     | Na       | 30.39      | 1.76 | 39.83   | 6.38  | 54.74 | 9.21  | 45.63   | 1.8   |
| Forest     | 8     | Na       | 27.75      | 1.23 | 45.93   | 0.61  | 42.27 | 7.13  | 53.11   | 8.14  |
| Forest     | 9     | Na       | 29.35      | 0.92 | 49.42   | 0.78  | 38.83 | 5.83  | 65.55   | 11.22 |
| Forest     | 10    | Na       | 32.82      | 1.15 | 58.02   | 4.65  | 48.99 | 3.51  | 72.8    | 14.18 |
| Forest     | 11    | Na       | 34.21      | 1.16 | 51.16   | 9.47  | 46.46 | 3.68  | 84.37   | 19.38 |
| Forest     | 12    | Na       | 36.28      | 0.71 | 64.06   | 1.82  | 49.35 | 3.26  | 99.53   | 19.72 |
| Forest     | 13    | Na       | 35.34      | 0.95 | 67.54   | 3.21  | 50.36 | 3.35  | 104.54  | 19.65 |
| Forest     | 14    | Na       | 36.53      | 1.18 | 58.85   | 13.68 | 53.32 | 2.82  | 108.05  | 21.85 |

|            |       |          | Treatments |       |         |       |        |       |         |       |
|------------|-------|----------|------------|-------|---------|-------|--------|-------|---------|-------|
|            |       |          | Control    |       | Steiner |       | Solid  |       | Organic |       |
| Soil       | Weeks | Variable | Mean       | S.E.  | Mean    | S.E.  | Mean   | S.E.  | Mean    | S.E.  |
| Calcareous | 1     | S        | 67.59      | 1.8   | 88.92   | 10.38 | 64.56  | 11.67 | 114.04  | 42.46 |
| Calcareous | 2     | S        | 66.63      | 7.93  | 57.75   | 14.7  | 50.45  | 6.6   | 66.79   | 10.83 |
| Calcareous | 3     | S        | 75.01      | 1.13  | 64.68   | 3.93  | 60.52  | 12.37 | 70.38   | 4.8   |
| Calcareous | 4     | S        | 75.91      | 1.22  | 56.49   | 3.92  | 73.8   | 13.04 | 73.19   | 5.34  |
| Calcareous | 5     | S        | 75.65      | 5.53  | 57.4    | 4.45  | 80.58  | 8.15  | 85.45   | 8.65  |
| Calcareous | 6     | S        | 83.16      | 3.81  | 61.91   | 5.52  | 92.7   | 7.42  | 78.92   | 4.08  |
| Calcareous | 7     | S        | 83.27      | 5.7   | 61.14   | 10.51 | 71.51  | 7.37  | 87.07   | 7.34  |
| Calcareous | 8     | S        | 64.91      | 8.53  | 61.19   | 6.12  | 59.93  | 12.09 | 78.92   | 3.61  |
| Calcareous | 9     | S        | 76.61      | 8.92  | 59.14   | 12    | 60.81  | 1.31  | 86.7    | 5.76  |
| Calcareous | 10    | S        | 64.79      | 1.55  | 46.63   | 4.38  | 61.33  | 4.47  | 76.58   | 3.51  |
| Calcareous | 11    | S        | 68.57      | 2.4   | 53.86   | 2.6   | 140.49 | 41.84 | 84.25   | 4.19  |
| Calcareous | 12    | S        | 90.07      | 10.41 | 87.12   | 5.94  | 120.47 | 31.3  | 133.5   | 12.84 |
| Calcareous | 13    | S        | 50.44      | 9.15  | 48.31   | 9.97  | 59.14  | 9.17  | 80.57   | 21.16 |
| Calcareous | 14    | S        | 61.66      | 5.05  | 57.97   | 7.96  | 93.84  | 8.58  | 96.72   | 8.46  |
| Forest     | 1     | S        | 69.57      | 4.01  | 117.63  | 41.08 | 119.6  | 33.95 | 110.6   | 35.25 |
| Forest     | 2     | S        | 64.91      | 6.74  | 78.33   | 7.34  | 79.66  | 24.23 | 67.03   | 9.46  |
| Forest     | 3     | S        | 66.23      | 4.46  | 80.36   | 7.61  | 76.76  | 16.73 | 69.53   | 7.99  |
| Forest     | 4     | S        | 66.14      | 3.96  | 82.39   | 4.81  | 77.81  | 12.11 | 72.39   | 6.6   |
| Forest     | 5     | S        | 64.93      | 2.92  | 86.2    | 7.77  | 76.82  | 9.74  | 79.96   | 9.17  |
| Forest     | 6     | S        | 63.77      | 2.76  | 91.64   | 2.4   | 104.52 | 18.5  | 80.74   | 9.35  |
| Forest     | 7     | S        | 69.69      | 7.64  | 104.86  | 16.74 | 101.73 | 23.31 | 99.51   | 4.69  |
| Forest     | 8     | S        | 61.64      | 2.85  | 97.18   | 5.27  | 87.29  | 13.38 | 101.74  | 7.6   |
| Forest     | 9     | S        | 76.12      | 7.74  | 121.05  | 12.25 | 83     | 11.76 | 133.73  | 2.87  |
| Forest     | 10    | S        | 62.45      | 2.12  | 107.47  | 15.75 | 68.04  | 7.72  | 107.2   | 10.49 |
| Forest     | 11    | S        | 72.98      | 7.99  | 104.08  | 23.66 | 95.76  | 2.64  | 116.26  | 17.08 |
| Forest     | 12    | S        | 86.32      | 8.35  | 152.93  | 13.44 | 115.03 | 14.09 | 161.15  | 33.49 |
| Forest     | 13    | S        | 73.52      | 4.8   | 138.23  | 17.6  | 89.29  | 8.53  | 132.77  | 4.38  |
| Forest     | 14    | S        | 78.27      | 7.3   | 121.1   | 33.03 | 89.99  | 11.86 | 133.97  | 16.63 |

| Treatments |       |          |         |      |         |        |       |      |         |        |
|------------|-------|----------|---------|------|---------|--------|-------|------|---------|--------|
|            |       |          | Control |      | Steiner |        | Solid |      | Organic |        |
| Soil       | Weeks | Variable | Mean    | S.E. | Mean    | S.E.   | Mean  | S.E. | Mean    | S.E.   |
| Calcareous | 1     | Zn       | 0.02    | 0.01 | 0.02    | 0.0033 | 0.21  | 0.09 | 0.02    | 0.0033 |
| Calcareous | 2     | Zn       | 0.02    | 0.00 | 0.01    | 0.0033 | 0.09  | 0.02 | 0.01    | 0      |
| Calcareous | 3     | Zn       | 0.07    | 0.03 | 0.04    | 0.02   | 0.09  | 0.03 | 0.02    | 0.01   |
| Calcareous | 4     | Zn       | 0.00    | 0.00 | 0.0033  | 0.0033 | 0.41  | 0.17 | 0       | 0      |
| Calcareous | 5     | Zn       | 0.12    | 0.04 | 0.08    | 0.02   | 0.29  | 0.15 | 0.06    | 0.03   |
| Calcareous | 6     | Zn       | 0.01    | 0.00 | 0.01    | 0      | 0.66  | 0.33 | 0.01    | 0      |
| Calcareous | 7     | Zn       | 0.06    | 0.02 | 0.06    | 0.01   | 0.2   | 0.06 | 0.06    | 0.01   |
| Calcareous | 8     | Zn       | 0.01    | 0.00 | 0.01    | 0      | 0.01  | 0    | 0.01    | 0      |
| Calcareous | 9     | Zn       | 0.02    | 0.01 | 0.01    | 0      | 0.01  | 0    | 0.01    | 0      |
| Calcareous | 10    | Zn       | 0.01    | 0.00 | 0.05    | 0.0033 | 0.1   | 0.01 | 0.02    | 0.0033 |
| Calcareous | 11    | Zn       | 0.01    | 0.01 | 0.04    | 0.02   | 0.18  | 0.03 | 0.02    | 0.01   |
| Calcareous | 12    | Zn       | 0.01    | 0.00 | 0.05    | 0.01   | 0.06  | 0.01 | 0.02    | 0      |
| Calcareous | 13    | Zn       | 0.00    | 0.00 | 0.05    | 0.01   | 0.06  | 0.01 | 0.02    | 0.0033 |
| Calcareous | 14    | Zn       | 0.02    | 0.00 | 0.04    | 0.01   | 0.06  | 0.01 | 0.02    | 0.01   |
| Forest     | 1     | Zn       | 0.04    | 0.00 | 0.07    | 0.03   | 1.28  | 0.85 | 0.03    | 0.01   |
| Forest     | 2     | Zn       | 0.02    | 0.00 | 0.13    | 0.04   | 1.23  | 0.32 | 0.02    | 0.0033 |
| Forest     | 3     | Zn       | 0.02    | 0.01 | 0.14    | 0.07   | 1.24  | 0.32 | 0.02    | 0.01   |
| Forest     | 4     | Zn       | 0.00    | 0.00 | 0.18    | 0.07   | 2     | 0.41 | 0.01    | 0.0033 |
| Forest     | 5     | Zn       | 0.07    | 0.02 | 0.38    | 0.12   | 1.49  | 0.44 | 0.07    | 0.01   |
| Forest     | 6     | Zn       | 0.01    | 0.00 | 0.32    | 0.25   | 2.29  | 0.6  | 0.01    | 0      |
| Forest     | 7     | Zn       | 0.06    | 0.01 | 0.43    | 0.26   | 1.65  | 0.19 | 0.06    | 0.01   |
| Forest     | 8     | Zn       | 0.01    | 0.00 | 0.01    | 0      | 0.1   | 0.09 | 0.01    | 0      |
| Forest     | 9     | Zn       | 0.01    | 0.00 | 0.01    | 0      | 0.01  | 0    | 0.01    | 0      |
| Forest     | 10    | Zn       | 0.04    | 0.00 | 0.1     | 0.03   | 0.07  | 0.01 | 0.03    | 0.0033 |
| Forest     | 11    | Zn       | 0.03    | 0.01 | 0.15    | 0.09   | 0.09  | 0.02 | 0.03    | 0.01   |
| Forest     | 12    | Zn       | 0.03    | 0.00 | 0.19    | 0.1    | 0.08  | 0.01 | 0.03    | 0      |
| Forest     | 13    | Zn       | 0.02    | 0.00 | 0.15    | 0.03   | 0.06  | 0.01 | 0.04    | 0.01   |
| Forest     | 14    | Zn       | 0.03    | 0.01 | 0.21    | 0.08   | 0.06  | 0.02 | 0.03    | 0.01   |

| Treatments |       |          |         |      |         |      |       |      |         |      |
|------------|-------|----------|---------|------|---------|------|-------|------|---------|------|
|            |       |          | Control |      | Steiner |      | Solid |      | Organic |      |
| Soil       | Weeks | Variable | Mean    | S.E. | Mean    | S.E. | Mean  | S.E. | Mean    | S.E. |
| Calcareous | 1     | B        | 1.14    | 0.41 | 1.28    | 0.29 | 1.54  | 0.14 | 1.49    | 0.15 |
| Calcareous | 2     | B        | 1.75    | 0.13 | 1.74    | 0.23 | 1.77  | 0.13 | 1.81    | 0.1  |
| Calcareous | 3     | B        | 1.88    | 0.16 | 1.77    | 0.13 | 2.02  | 0.38 | 1.72    | 0.15 |
| Calcareous | 4     | B        | 2.33    | 0.08 | 1.91    | 0.06 | 3.32  | 0.96 | 2.2     | 0.18 |
| Calcareous | 5     | B        | 3.28    | 0.71 | 1.48    | 0.27 | 2.03  | 0.51 | 1.7     | 0.18 |
| Calcareous | 6     | B        | 0.28    | 0.15 | 0.36    | 0.18 | 1.33  | 0.49 | 0.44    | 0.22 |
| Calcareous | 7     | B        | 0.67    | 0.23 | 0.45    | 0.1  | 0.86  | 0.22 | 0.6     | 0.32 |
| Calcareous | 8     | B        | 0.18    | 0.09 | 0.09    | 0.02 | 0.58  | 0.49 | 0.17    | 0.08 |
| Calcareous | 9     | B        | 0.79    | 0.18 | 1.18    | 0.08 | 0.77  | 0.36 | 0.85    | 0.18 |
| Calcareous | 10    | B        | 2.89    | 0.38 | 2.29    | 0.32 | 2.88  | 0.14 | 2.75    | 0.24 |
| Calcareous | 11    | B        | 1.79    | 0.26 | 1.31    | 0.12 | 2.31  | 0.49 | 1.82    | 0.08 |
| Calcareous | 12    | B        | 1.48    | 0.14 | 1.47    | 0.12 | 1.89  | 0.24 | 1.54    | 0.11 |
| Calcareous | 13    | B        | 1.05    | 0.17 | 1.2     | 0.08 | 1.88  | 0.42 | 1.37    | 0.13 |
| Calcareous | 14    | B        | 0.74    | 0.07 | 0.64    | 0.29 | 0.49  | 0.37 | 0.51    | 0.12 |
| Forest     | 1     | B        | 0.92    | 0.42 | 0.93    | 0.33 | 1.09  | 0.28 | 1.1     | 0.23 |
| Forest     | 2     | B        | 1.22    | 0.21 | 1.13    | 0.18 | 0.92  | 0.11 | 1.03    | 0.14 |
| Forest     | 3     | B        | 1.51    | 0.07 | 1.11    | 0.08 | 0.8   | 0.07 | 1.05    | 0.08 |
| Forest     | 4     | B        | 1.51    | 0.06 | 1.74    | 0.19 | 1.16  | 0.12 | 1.37    | 0.15 |
| Forest     | 5     | B        | 1.09    | 0.30 | 0.58    | 0.14 | 0.24  | 0.06 | 0.65    | 0.09 |
| Forest     | 6     | B        | 0.30    | 0.10 | 0.68    | 0.34 | 0.54  | 0.41 | 0.84    | 0.42 |
| Forest     | 7     | B        | 0.36    | 0.17 | 0.66    | 0.25 | 0.49  | 0.16 | 0.31    | 0.12 |
| Forest     | 8     | B        | 0.17    | 0.04 | 0.5     | 0.03 | 0.41  | 0.13 | 0.39    | 0.05 |
| Forest     | 9     | B        | 1.38    | 0.25 | 2.25    | 0.18 | 2.43  | 0.24 | 1.91    | 0.12 |
| Forest     | 10    | B        | 2.11    | 0.23 | 1.93    | 0.18 | 1.72  | 0.14 | 1.98    | 0.1  |
| Forest     | 11    | B        | 1.07    | 0.11 | 1.28    | 0.21 | 0.82  | 0.28 | 1.05    | 0.37 |
| Forest     | 12    | B        | 1.24    | 0.05 | 1.17    | 0.06 | 1.17  | 0.08 | 1.26    | 0.04 |
| Forest     | 13    | B        | 0.89    | 0.04 | 0.76    | 0.11 | 0.78  | 0.11 | 0.87    | 0.15 |
| Forest     | 14    | B        | 0.62    | 0.25 | 1.1     | 0.39 | 1.12  | 0.22 | 1.06    | 0.33 |
